# Supplementary material for: Flavivirus and Filovirus EvoPrinters: New alignment tools for the comparative analysis of viral evolution
Source: PLOS journal article supplement (doi:10.1371/journal.pntd.0005673), 2017-06-16
Supplement: S3 (10.1371/journal.pntd.0005673.s003) [file journal.pntd.0005673.s003]

| 1461  | 1890  | 3552  | 3578  | 3975  | 5181  | 5320  | 6615  | 6657  | 6711  | 6723  | 6969  | 7079  | 9228  | 9297  | Input reference genome:<br>Zika_KU365779.1_Brazil_2015 |
|-------|-------|-------|-------|-------|-------|-------|-------|-------|-------|-------|-------|-------|-------|-------|--------------------------------------------------------|
| AAAGT | ACTGC | GACCA | ATTCT | GATAA | TTGCA | GAGGC | ATTAT | TTCCT | ACTCT | AGCGC | GGGGC | ACTTC | CGTAT | CTGGA |                                                        |
|       |       |       |       |       |       |       |       |       |       |       |       |       |       |       | Brazil 3                                               |
|       |       |       |       |       |       |       |       |       |       |       |       |       |       |       | KU365779.1_Brazil_2015                                 |
|       |       |       |       |       |       |       |       |       |       |       |       |       |       |       | KU707826.1_Brazil_2015                                 |
|       |       |       |       |       |       |       |       |       |       |       |       |       |       |       | KU365777.1_Brazil_2015                                 |
|       |       |       |       |       |       |       |       |       |       |       |       |       |       |       | Brazil 2                                               |
| G     |       |       |       |       |       |       |       |       |       |       |       |       | C     |       | KU940224.1_Brazil_2015                                 |
| G     |       |       |       |       |       |       |       |       |       |       |       |       | C     |       | KU940228.1_Brazil_2015                                 |
| G     |       |       |       |       |       |       |       |       |       |       |       |       | C     |       | KX520666.1_Brazil_2015                                 |
|       |       |       |       |       |       |       |       |       |       |       |       |       |       |       | Brazil 1                                               |
| G     | C     | T     |       |       |       |       |       | T     |       |       |       |       | C     |       | KX197192.1_Brazil_2015                                 |
| G     | C     | T     |       |       |       |       |       | T     |       |       | A     |       | C     |       | KX811222.1_Brazil_2015                                 |
| G     | C     | T     |       |       |       |       |       | T     |       |       | A     |       | C     |       | KU729217.2_Brazil_2015                                 |
|       |       |       |       |       |       |       |       |       |       |       |       |       |       |       | Brazil 4                                               |
| G     | C     | T     |       | C     |       | A     |       | T     |       |       |       |       | C     |       | KU991811.1_Brazil_2016                                 |
| G     | C     | T     |       | C     |       | A     |       | T     |       |       |       |       | C     |       | KU497555.1_Brazil_2015                                 |
| G     | C     | T     |       |       |       | A     |       | T     |       |       |       |       | C     |       | KU729218.1_Brazil_2015                                 |
|       |       |       |       |       |       |       |       |       |       |       |       |       |       |       | Central America 1                                      |
| G     | C     | T     |       | C     |       | A     |       | T     |       |       |       |       | C     |       | KX087102.1_Columbia_2015                               |
| G     | C     | T     |       | C     |       | A     |       | T     |       |       |       |       | C     |       | KX247646.1_Columbia_2016                               |
| G     | C     | T     |       | C     |       | A     |       | T     |       |       |       |       | C     |       | KU820897.1_Columbia_2015                               |
| G     | C     | T     |       | C     |       | A     |       | T     |       |       |       |       | C     |       | KU647676.1_Martinique_2015                             |
| G     | C     | T     |       | C     |       | A     |       | T     |       |       |       |       | C     |       | KU922960.1_Mexico_2016                                 |
| G     | C     | T     |       | C     |       | A     |       | T     |       |       |       |       | C     |       | KU922923.1_Mexico_2016                                 |
| G     | C     | T     |       | C     |       | A     |       | T     |       |       |       |       | C     |       | KX198135.1_Panama_2016                                 |
| G     | C     | T     |       | C     |       | A     |       | T     |       |       |       |       | C     |       | KX156775.1_Panama_2015                                 |
| G     | C     | T     |       | C     |       | A     |       | T     |       |       |       |       | C     |       | KX156776.1_Panama_2015                                 |
| G     | C     | T     |       | C     |       | A     |       | T     |       |       |       |       | C     |       | KX702400.1_Venezuela_2016                              |
|       |       |       |       |       |       |       |       |       |       |       |       |       |       |       | Central America 2                                      |
| G     | C     | T     |       |       | A     |       |       | T     | C     | T     |       |       |       |       | KU870645.1_Guatemala_2016                              |
| G     | C     | T     |       |       | A     |       |       | T     | C     | T     |       |       |       |       | KU501216.1_Guatemala_2015                              |
| G     | C     | T     |       |       | A     |       |       | T     | C     | T     |       |       |       |       | KU501217.1_Guatemala_2015                              |
| G     | C     | T     |       |       | A     |       |       | T     | C     | T     |       |       |       |       | KX262887.1_Honduras_2016                               |
| G     | C     | T     |       |       | A     |       |       | T     | C     | T     |       |       |       |       | KX694534.1_Honduras_2015                               |
| G     | C     | T     |       |       | A     |       |       | T     | C     | T     |       |       |       |       | KX446950.1_Mexico_2016                                 |
| G     | C     | T     |       |       | A     |       |       | T     | C     | T     |       |       |       |       | KX247632.1_Mexico_2015                                 |
| G     | C     | T     |       |       | A     |       |       | T     | C     | T     |       |       |       |       | KX446951.1_Mexico_2016                                 |
|       |       |       |       |       |       |       |       |       |       |       |       |       |       |       | South America & Caribbean                              |
| N     |       |       | C     |       |       |       | A     |       |       |       |       | C     |       |       | KX766028.1_Dom.Republic_2016                           |
|       |       |       | C     |       |       |       | A     |       |       |       |       | C     |       |       | KU758877.1_FrenchGuiana_2015                           |
|       |       |       | C     |       |       |       | A     |       |       |       |       | C     |       |       | KU501215.1_PuertoRico_2015                             |
|       |       |       | C     |       |       |       | A     |       |       |       |       | C     |       |       | KX377337.1_PuertoRico_2016                             |
|       |       |       | C     |       |       |       | A     |       |       |       |       | C     |       |       | KX601168.1_PuertoRico_2015                             |
|       |       |       | C     |       |       |       | A     |       |       |       |       | C     |       |       | KU937936.1_Suriname_2016                               |
|       |       |       |       |       |       |       |       |       |       |       |       |       |       |       | Dom.Republic & Florida                                 |
| G     |       |       |       |       |       |       |       | T     |       |       | A     |       | C     | A     | KU853012.1_Dom.Republic_2016                           |
| G     |       |       |       |       |       |       |       | T     |       |       | A     |       | C     | A     | KU853013.1_Dom.Republic_2016                           |
| G     |       |       |       |       |       |       |       | T     |       |       | A     |       | C     | A     | KX842449.1_Florida_2016                                |
| G     |       |       |       |       |       |       |       | T     |       |       | A     |       | C     | A     | KX838905.1_Florida_Aedes_2016                          |
| G     |       |       |       |       |       |       |       | T     |       |       | A     |       | C     | A     | KX832731.1_Florida_2016                                |

### **S3\_fig.pdf Identity SNPs resolve different western hemisphere ZIKV sublineages**

An *EvoDifference* print of the *Zika\_KU365779.1\_Brazil\_2015* strain aligned with 41 other western hemisphere isolates identifies eight sublineages distinguished by ID-SNPs. Three of the four Brazilian sublineages corresponds to those of figure 3 and are presented here for comparison. Strains from Mexico fall into two classes, designated Central America 1 & 2. Puerto Rico sequences fall into a third class including strains from French Guiana and Suriname. Florida sequences fall into a separate group shared with two Dominican Republic strains. Note, the Dominican Republic isolates are heterogenous, as they share ID-SNPs with either Puerto Rico or Florida but not with both subgroups. Only bases that disagree with the input reference sequences are shown.
