# Supplementary material for: Flavivirus and Filovirus EvoPrinters: New alignment tools for the comparative analysis of viral evolution
Source: PLOS journal article supplement (doi:10.1371/journal.pntd.0005673), 2017-06-16
Supplement: S6 (10.1371/journal.pntd.0005673.s006) [file journal.pntd.0005673.s006]

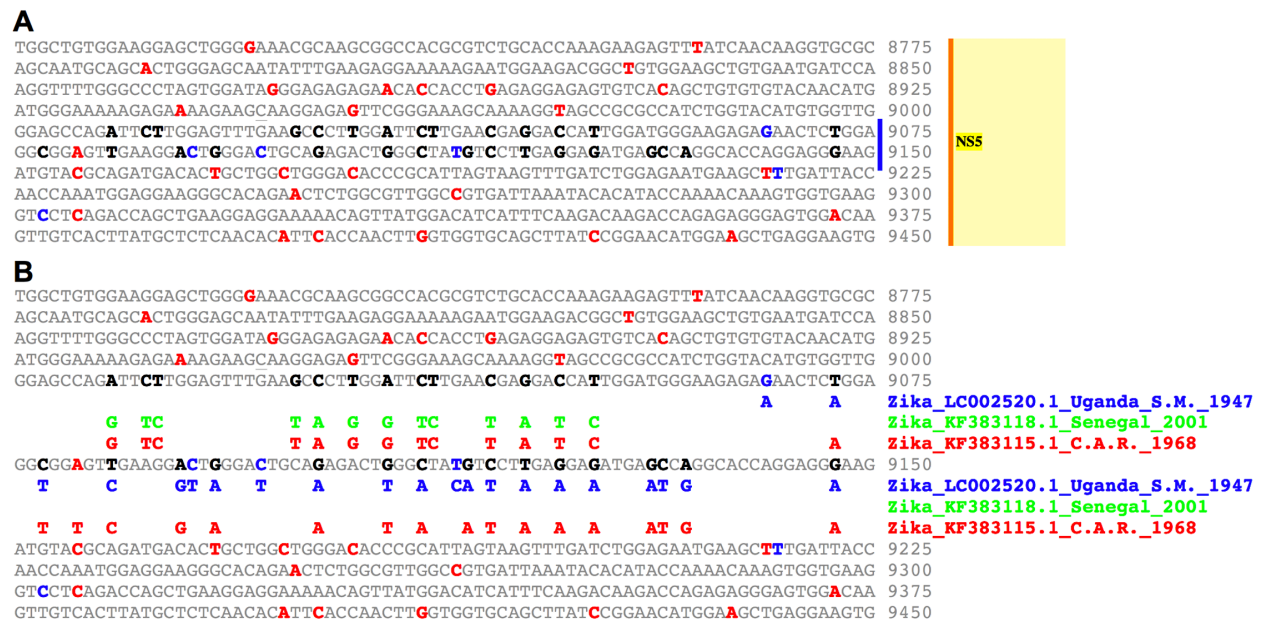

**S6\_fig.pdf** Abrupt changes in SNP profiles identified in an African lineage ZIKV  
*EvoDifference* print indicate putative recombinant exchanges

(A) An *EvoDifference* print corresponding to 750 bases of the NS5 coding region from the *Zika\_KF383119\_ Senegal\_2001* strain generated with three other African genomes (listed in Panel B). The blue vertical bar highlights a 126 base sequence that contains a higher SNP density relative to flanking sequences. (B) Line numbers 9,075 to 9,150 were expanded to reveal SNP patterns. Note the difference in SNP patterns and alternating changes in their density between the *Zika\_LC002520.1\_Uganda\_S.M.\_1947* and the *Zika\_KF383118.1\_Senegal\_2001* isolates, while the *Zika\_KF383115.1\_C.A.R.\_1968* strain shares SNPs with both the Uganda and Senegal strains. Color-coding as described in Figure 1.
